# Supplementary material for: Silencing of Transposable Elements Mediated by 5-mC and Compensation of the Heterochromatin Content by Presence of B Chromosomes in Astyanax scabripinnis
Source: MDPI journal article supplement (doi:10.3390/cells10051162), 2021-05-11
Supplement: s1 [file s1]

## Supplementary Materials

**Table S1.** Individual values of 5-mC in the genomic DNA of B+ and B− males.

|         | Individual | Value | Log value            |
|---------|------------|-------|----------------------|
| Male B− |            |       |                      |
|         | 1          | 0.07  | −1.1549019599857431  |
|         | 1          | 0.066 | −1.1804560644581312  |
|         | 1          | 0.057 | −1.2441251443275085  |
|         | 1          | 0.053 | −1.2757241303992111  |
|         | 1          | 0.052 | −1.2839966563652008  |
|         | 1          | 0.052 | −1.2839966563652008  |
|         | 1          | 0.08  | −1.0969100130080565  |
|         | 1          | 0.061 | −1.2146701649892331  |
|         | 1          | 0.105 | −0.978810700930062   |
|         | 1          | 0.089 | −1.0506099933550872  |
|         | 1          | 0.107 | −0.97061622231479039 |
|         | 1          | 0.067 | −1.1739251972991736  |
|         | 1          | 0.051 | −1.2924298239020637  |
|         | 1          | 0.046 | −1.3372421683184259  |
|         | 1          | 0.054 | −1.2676062401770316  |
|         | 1          | 0.054 | −1.2676062401770316  |
|         | 1          | 0.059 | −1.2291479883578558  |
|         | 1          | 0.052 | −1.2839966563652008  |
|         | 1          | 0.039 | −1.4089353929735009  |
|         | 1          | 0.047 | −1.3279021420642825  |
|         | 1          | 0.062 | −1.2076083105017461  |
|         | 1          | 0.048 | −1.3187587626244128  |
|         | 1          | 0.108 | −0.96657624451305035 |
|         | 1          | 0.045 | −1.3467874862246563  |
|         | 1          | 0.074 | −1.1307682802690238  |
|         | 1          | 0.079 | −1.1023729087095586  |
|         | 1          | 0.096 | −1.0177287669604316  |
|         | 1          | 0.08  | −1.0969100130080565  |
|         | 1          | 0.047 | −1.3279021420642825  |
|         | 1          | 0.058 | −1.2365720064370627  |
|         | 1          | 0.093 | −1.031517051446065   |
|         | 1          | 1.198 | 0.078456818053292562 |
|         | 1          | 0.177 | −0.75202673363819339 |
|         | 1          | 0.075 | −1.1249387366083     |
|         | 1          | 0.047 | −1.3279021420642825  |
|         | 1          | 0.066 | −1.1804560644581312  |
|         | 1          | 0.098 | −1.0087739243075051  |
|         | 1          | 0.151 | −0.82102305270683062 |
|         | 1          | 0.073 | −1.1366771398795441  |
|         | 1          | 0.089 | −1.0506099933550872  |
|         | 1          | 0.14  | −0.85387196432176193 |
|         | 1          | 0.055 | −1.2596373105057561  |
|         | 1          | 0.08  | −1.0969100130080565  |

|   |       |                      |
|---|-------|----------------------|
| 1 | 0.103 | −0.98716277529482777 |
| 1 | 0.1   | −1                   |
| 1 | 0.072 | −1.1426675035687315  |
| 1 | 0.077 | −1.1135092748275182  |
| 1 | 0.085 | −1.0705810742857072  |
| 1 | 0.083 | −1.080921907623926   |
| 1 | 0.067 | −1.1739251972991736  |
| 1 | 0.089 | −1.0506099933550872  |
| 1 | 0.107 | −0.97061622231479039 |
| 1 | 0.107 | −0.97061622231479039 |
| 1 | 0.146 | −0.835647144215563   |
| 1 | 0.091 | −1.0409586076789064  |
| 1 | 0.152 | −0.81815641205522749 |
| 1 | 0.101 | −0.99567862621735737 |
| 1 | 0.082 | −1.0861861476162833  |
| 1 | 0.141 | −0.8507808873446201  |
| 1 | 0.133 | −0.87614835903291421 |
| 1 | 0.1   | −1                   |
| 1 | 0.061 | −1.2146701649892331  |
| 1 | 0.112 | −0.9507819773298184  |
| 1 | 0.075 | −1.1249387366083     |
| 1 | 0.094 | −1.0268721464003014  |
| 1 | 0.064 | −1.1938200260161129  |
| 1 | 0.071 | −1.1487416512809248  |
| 1 | 0.084 | −1.0757207139381184  |
| 1 | 0.056 | −1.2518119729937995  |
| 1 | 0.069 | −1.1611509092627446  |
| 1 | 0.145 | −0.83863199776502517 |
| 1 | 0.066 | −1.1804560644581312  |
| 1 | 0.067 | −1.1739251972991736  |
| 1 | 0.06  | −1.2218487496163564  |
| 1 | 1.258 | 0.099680641109250123 |
| 1 | 0.2   | −0.69897000433601875 |
| 1 | 0.097 | −1.0132282657337552  |
| 1 | 0.118 | −0.92811799269387463 |
| 1 | 0.078 | −1.1079053973095197  |
| 1 | 0.077 | −1.1135092748275182  |
| 1 | 0.128 | −0.89279003035213167 |
| 1 | 0.126 | −0.89962945488243706 |
| 1 | 0.069 | −1.1611509092627446  |
| 1 | 0.066 | −1.1804560644581312  |
| 1 | 0.133 | −0.87614835903291421 |
| 1 | 0.219 | −0.65955588515988162 |
| 1 | 0.153 | −0.81530856918240124 |
| 1 | 0.084 | −1.0757207139381184  |
| 1 | 0.084 | −1.0757207139381184  |
| 1 | 0.103 | −0.98716277529482777 |
| 1 | 0.075 | −1.1249387366083     |
| 1 | 0.111 | −0.95467702121334252 |
| 1 | 0.108 | −0.96657624451305035 |
| 1 | 0.076 | −1.1191864077192086  |

|   |       |                      |
|---|-------|----------------------|
| 1 | 0.075 | -1.1249387366083     |
| 1 | 0.093 | -1.031517051446065   |
| 1 | 0.089 | -1.0506099933550872  |
| 1 | 0.086 | -1.0655015487564323  |
| 1 | 0.057 | -1.2441251443275085  |
| 1 | 0.079 | -1.1023729087095586  |
| 1 | 0.059 | -1.2291479883578558  |
| 1 | 0.115 | -0.9393021596463883  |
| 1 | 0.073 | -1.1366771398795441  |
| 1 | 0.072 | -1.1426675035687315  |
| 1 | 0.09  | -1.0457574905606752  |
| 1 | 0.075 | -1.1249387366083     |
| 1 | 0.201 | -0.69680394257951106 |
| 1 | 0.073 | -1.1366771398795441  |
| 1 | 0.129 | -0.889410289700751   |
| 1 | 0.098 | -1.0087739243075051  |
| 1 | 0.078 | -1.1079053973095197  |
| 1 | 0.079 | -1.1023729087095586  |
| 1 | 0.103 | -0.98716277529482777 |
| 1 | 0.152 | -0.81815641205522749 |
| 1 | 0.153 | -0.81530856918240124 |
| 1 | 0.143 | -0.84466396253493825 |
| 1 | 0.135 | -0.86966623150499389 |
| 1 | 0.065 | -1.1870866433571443  |
| 1 | 0.173 | -0.76195389687120463 |
| 1 | 0.079 | -1.1023729087095586  |
| 1 | 0.089 | -1.0506099933550872  |
| 1 | 0.056 | -1.2518119729937995  |
| 1 | 0.065 | -1.1870866433571443  |
| 1 | 0.053 | -1.2757241303992111  |
| 1 | 0.153 | -0.81530856918240124 |
| 1 | 0.162 | -0.790484985457369   |
| 1 | 0.071 | -1.1487416512809248  |
| 1 | 0.078 | -1.1079053973095197  |
| 1 | 0.15  | -0.82390874094431876 |
| 1 | 0.075 | -1.1249387366083     |
| 1 | 0.083 | -1.080921907623926   |
| 1 | 0.038 | -1.4202164033831899  |
| 1 | 0.094 | -1.0268721464003014  |
| 1 | 0.038 | -1.4202164033831899  |
| 1 | 1.222 | 0.087071205906535415 |
| 1 | 0.094 | -1.0268721464003014  |
| 1 | 0.09  | -1.0457574905606752  |
| 1 | 0.093 | -1.031517051446065   |
| 1 | 0.107 | -0.97061622231479039 |
| 1 | 0.08  | -1.0969100130080565  |
| 1 | 0.088 | -1.0555173278498313  |
| 1 | 0.135 | -0.86966623150499389 |
| 1 | 0.11  | -0.958607314841775   |
| 1 | 0.109 | -0.96257350205937642 |
| 1 | 0.079 | -1.1023729087095586  |

|   |       |                       |
|---|-------|-----------------------|
| 1 | 0.188 | −0.72584215073632019  |
| 1 | 0.078 | −1.1079053973095197   |
| 1 | 0.112 | −0.9507819773298184   |
| 1 | 0.094 | −1.0268721464003014   |
| 1 | 0.077 | −1.1135092748275182   |
| 1 | 0.151 | −0.82102305270683062  |
| 1 | 0.103 | −0.98716277529482777  |
| 1 | 0.126 | −0.89962945488243706  |
| 1 | 0.087 | −1.0604807473813815   |
| 1 | 0.127 | −0.89619627904404309  |
| 1 | 0.071 | −1.1487416512809248   |
| 1 | 0.881 | −0.055024091587952087 |
| 1 | 0.079 | −1.1023729087095586   |
| 1 | 0.203 | −0.69250396208678711  |
| 1 | 0.066 | −1.1804560644581312   |
| 1 | 0.156 | −0.80687540164553839  |
| 1 | 0.13  | −0.88605664769316317  |
| 1 | 0.104 | −0.98296666070121963  |
| 1 | 0.093 | −1.031517051446065    |
| 1 | 0.099 | −1.00436480540245     |
| 1 | 0.106 | −0.97469413473522981  |
| 1 | 0.104 | −0.98296666070121963  |
| 1 | 0.146 | −0.835647144215563    |
| 1 | 0.118 | −0.92811799269387463  |
| 1 | 0.167 | −0.77728352885241669  |
| 1 | 0.078 | −1.1079053973095197   |
| 1 | 0.083 | −1.080921907623926    |
| 1 | 0.104 | −0.98296666070121963  |
| 1 | 0.05  | −1.3010299956639813   |
| 1 | 0.076 | −1.1191864077192086   |
| 1 | 0.125 | −0.90308998699194354  |
| 1 | 0.063 | −1.2006594505464183   |
| 1 | 0.062 | −1.2076083105017461   |
| 1 | 0.12  | −0.92081875395237522  |
| 1 | 0.108 | −0.96657624451305035  |
| 1 | 0.106 | −0.97469413473522981  |
| 1 | 0.708 | −0.149966742310231    |
| 1 | 0.147 | −0.83268266525182388  |
| 1 | 0.137 | −0.86327943284359321  |
| 1 | 0.212 | −0.67366413907124856  |
| 1 | 0.103 | −0.98716277529482777  |
| 1 | 0.174 | −0.75945075171740029  |
| 1 | 0.083 | −1.080921907623926    |
| 1 | 0.091 | −1.0409586076789064   |
| 1 | 0.221 | −0.65560772631488928  |
| 1 | 0.153 | −0.81530856918240124  |
| 1 | 0.124 | −0.906578314837765    |
| 1 | 0.086 | −1.0655015487564323   |
| 1 | 0.128 | −0.89279003035213167  |
| 1 | 0.056 | −1.2518119729937995   |
| 1 | 0.167 | −0.77728352885241669  |

|         |   |       |                       |
|---------|---|-------|-----------------------|
|         | 1 | 0.079 | −1.1023729087095586   |
|         | 1 | 0.118 | −0.92811799269387463  |
|         | 1 | 0.118 | −0.92811799269387463  |
|         | 1 | 0.137 | −0.86327943284359321  |
|         | 1 | 0.086 | −1.0655015487564323   |
|         | 1 | 0.091 | −1.0409586076789064   |
|         | 1 | 0.066 | −1.1804560644581312   |
|         | 1 | 0.126 | −0.89962945488243706  |
|         | 1 | 0.155 | −0.8096683018297085   |
|         | 1 | 0.156 | −0.80687540164553839  |
|         | 1 | 0.071 | −1.1487416512809248   |
|         | 1 | 0.153 | −0.81530856918240124  |
|         | 1 | 0.125 | −0.90308998699194354  |
|         | 1 | 0.132 | −0.87942606879415008  |
|         | 1 | 0.063 | −1.2006594505464183   |
|         | 1 | 0.035 | −1.4559319556497243   |
|         | 1 | 0.074 | −1.1307682802690238   |
|         | 1 | 0.062 | −1.2076083105017461   |
|         | 1 | 0.119 | −0.9244530386074693   |
|         | 1 | 1.292 | 0.1112625136590653    |
|         | 1 | 0.075 | −1.1249387366083      |
|         | 1 | 0.125 | −0.90308998699194354  |
|         | 1 | 0.087 | −1.0604807473813815   |
|         | 1 | 0.075 | −1.1249387366083      |
|         | 1 | 0.049 | −1.3098039199714864   |
|         | 1 | 0.093 | −1.031517051446065    |
|         | 1 | 0.083 | −1.080921907623926    |
|         | 1 | 0.139 | −0.85698519974590492  |
|         | 1 | 0.15  | −0.82390874094431876  |
|         | 1 | 0.111 | −0.95467702121334252  |
|         | 1 | 0.271 | −0.56703070912559428  |
|         | 1 | 0.091 | −1.0409586076789064   |
|         | 1 | 0.142 | −0.8477116556169435   |
|         | 1 | 0.135 | −0.86966623150499389  |
|         | 1 | 0.062 | −1.2076083105017461   |
|         | 1 | 0.056 | −1.2518119729937995   |
|         | 1 | 0.103 | −0.98716277529482777  |
|         | 1 | 0.076 | −1.1191864077192086   |
|         | 1 | 0.101 | −0.99567862621735737  |
|         | 1 | 0.115 | −0.9393021596463883   |
|         | 1 | 0.099 | −1.00436480540245     |
|         | 1 | 0.294 | −0.53165266958784274  |
|         | 1 | 0.09  | −1.0457574905606752   |
|         | 1 | 0.091 | −1.0409586076789064   |
|         | 1 | 0.105 | −0.978810700930062    |
|         | 1 | 0.93  | −0.031517051446064863 |
| Male B+ |   |       |                       |
|         | 2 | 0.07  | −1.1549019599857431   |
|         | 2 | 0.098 | −1.0087739243075051   |
|         | 2 | 0.125 | −0.90308998699194354  |
|         | 2 | 0.118 | −0.92811799269387463  |

|   |       |                       |
|---|-------|-----------------------|
| 2 | 0.159 | −0.79860287567954846  |
| 2 | 0.091 | −1.0409586076789064   |
| 2 | 0.101 | −0.99567862621735737  |
| 2 | 0.097 | −1.0132282657337552   |
| 2 | 0.127 | −0.89619627904404309  |
| 2 | 0.304 | −0.51712641639124624  |
| 2 | 0.146 | −0.835647144215563    |
| 2 | 0.111 | −0.95467702121334252  |
| 2 | 0.075 | −1.1249387366083      |
| 2 | 0.192 | −0.71669877129645043  |
| 2 | 0.105 | −0.978810700930062    |
| 2 | 0.133 | −0.87614835903291421  |
| 2 | 0.099 | −1.00436480540245     |
| 2 | 0.142 | −0.8477116556169435   |
| 2 | 0.071 | −1.1487416512809248   |
| 2 | 0.142 | −0.8477116556169435   |
| 2 | 0.801 | −0.096367483915762317 |
| 2 | 0.072 | −1.1426675035687315   |
| 2 | 0.068 | −1.1674910872937636   |
| 2 | 0.08  | −1.0969100130080565   |
| 2 | 0.103 | −0.98716277529482777  |
| 2 | 0.091 | −1.0409586076789064   |
| 2 | 0.085 | −1.0705810742857072   |
| 2 | 0.103 | −0.98716277529482777  |
| 2 | 0.106 | −0.97469413473522981  |
| 2 | 0.067 | −1.1739251972991736   |
| 2 | 1     | 0                     |
| 2 | 0.084 | −1.0757207139381184   |
| 2 | 0.188 | −0.72584215073632019  |
| 2 | 0.147 | −0.83268266525182388  |
| 2 | 0.094 | −1.0268721464003014   |
| 2 | 0.069 | −1.1611509092627446   |
| 2 | 0.11  | −0.958607314841775    |
| 2 | 0.195 | −0.70996538863748193  |
| 2 | 0.133 | −0.87614835903291421  |
| 2 | 0.079 | −1.1023729087095586   |
| 2 | 0.1   | −1                    |
| 2 | 0.091 | −1.0409586076789064   |
| 2 | 0.129 | −0.889410289700751    |
| 2 | 0.196 | −0.707743928643524    |
| 2 | 0.178 | −0.74957999769110606  |
| 2 | 0.129 | −0.889410289700751    |
| 2 | 0.127 | −0.89619627904404309  |
| 2 | 0.146 | −0.835647144215563    |
| 2 | 0.118 | −0.92811799269387463  |
| 2 | 0.2   | −0.69897000433601875  |
| 2 | 0.105 | −0.978810700930062    |
| 2 | 0.315 | −0.50168944621039946  |
| 2 | 0.266 | −0.575118363368933    |
| 2 | 0.094 | −1.0268721464003014   |
| 2 | 0.085 | −1.0705810742857072   |

|   |       |                       |
|---|-------|-----------------------|
| 2 | 0.135 | −0.86966623150499389  |
| 2 | 0.089 | −1.0506099933550872   |
| 2 | 0.124 | −0.906578314837765    |
| 2 | 0.119 | −0.9244530386074693   |
| 2 | 0.075 | −1.1249387366083      |
| 2 | 0.066 | −1.1804560644581312   |
| 2 | 0.12  | −0.92081875395237522  |
| 2 | 0.065 | −1.1870866433571443   |
| 2 | 0.073 | −1.1366771398795441   |
| 2 | 0.098 | −1.0087739243075051   |
| 2 | 0.079 | −1.1023729087095586   |
| 2 | 0.103 | −0.98716277529482777  |
| 2 | 0.857 | −0.067019178076801841 |
| 2 | 0.134 | −0.8728952016351923   |
| 2 | 0.094 | −1.0268721464003014   |
| 2 | 0.049 | −1.3098039199714864   |
| 2 | 0.094 | −1.0268721464003014   |
| 2 | 0.095 | −1.0222763947111522   |
| 2 | 0.103 | −0.98716277529482777  |
| 2 | 0.134 | −0.8728952016351923   |
| 2 | 0.761 | −0.11861534322942717  |
| 2 | 0.201 | −0.69680394257951106  |
| 2 | 0.097 | −1.0132282657337552   |
| 2 | 0.121 | −0.91721462968354994  |
| 2 | 0.169 | −0.77211329538632645  |
| 2 | 0.134 | −0.8728952016351923   |
| 2 | 0.108 | −0.96657624451305035  |
| 2 | 0.131 | −0.88272870434423567  |
| 2 | 0.198 | −0.70333480973846885  |
| 2 | 0.185 | −0.73282827159698616  |
| 2 | 0.123 | −0.91009488856060206  |
| 2 | 0.142 | −0.8477116556169435   |
| 2 | 0.214 | −0.66958622665080914  |
| 2 | 0.077 | −1.1135092748275182   |
| 2 | 0.089 | −1.0506099933550872   |
| 2 | 0.127 | −0.89619627904404309  |
| 2 | 0.084 | −1.0757207139381184   |
| 2 | 0.731 | −0.13608262304213956  |
| 2 | 0.188 | −0.72584215073632019  |
| 2 | 0.091 | −1.0409586076789064   |
| 2 | 0.617 | −0.20971483596675833  |
| 2 | 0.893 | −0.049148541111453566 |
| 2 | 0.088 | −1.0555173278498313   |
| 2 | 0.09  | −1.0457574905606752   |
| 2 | 0.069 | −1.1611509092627446   |
| 2 | 0.191 | −0.71896663275227246  |
| 2 | 0.147 | −0.83268266525182388  |
| 2 | 0.105 | −0.978810700930062    |
| 2 | 0.134 | −0.8728952016351923   |
| 2 | 0.118 | −0.92811799269387463  |
| 2 | 0.1   | −1                    |

|   |       |                       |
|---|-------|-----------------------|
| 2 | 0.066 | −1.1804560644581312   |
| 2 | 0.168 | −0.77469071827413716  |
| 2 | 0.218 | −0.66154350639539516  |
| 2 | 0.17  | −0.769551078621726    |
| 2 | 0.064 | −1.1938200260161129   |
| 2 | 1.126 | 0.051538390515327381  |
| 2 | 0.076 | −1.1191864077192086   |
| 2 | 0.044 | −1.3565473235138126   |
| 2 | 0.069 | −1.1611509092627446   |
| 2 | 0.286 | −0.543633966870957    |
| 2 | 0.083 | −1.080921907623926    |
| 2 | 0.051 | −1.2924298239020637   |
| 2 | 0.079 | −1.1023729087095586   |
| 2 | 0.083 | −1.080921907623926    |
| 2 | 0.071 | −1.1487416512809248   |
| 2 | 0.081 | −1.0915149811213503   |
| 2 | 0.068 | −1.1674910872937636   |
| 2 | 0.127 | −0.89619627904404309  |
| 2 | 0.283 | −0.54821356447570979  |
| 2 | 0.097 | −1.0132282657337552   |
| 2 | 0.966 | −0.015022873584506671 |
| 2 | 0.083 | −1.080921907623926    |
| 2 | 0.064 | −1.1938200260161129   |
| 2 | 0.112 | −0.9507819773298184   |
| 2 | 0.053 | −1.2757241303992111   |
| 2 | 0.056 | −1.2518119729937995   |
| 2 | 0.069 | −1.1611509092627446   |
| 2 | 0.044 | −1.3565473235138126   |
| 2 | 0.081 | −1.0915149811213503   |
| 2 | 0.075 | −1.1249387366083      |
| 2 | 0.091 | −1.0409586076789064   |
| 2 | 0.091 | −1.0409586076789064   |
| 2 | 0.084 | −1.0757207139381184   |
| 2 | 0.044 | −1.3565473235138126   |
| 2 | 0.053 | −1.2757241303992111   |
| 2 | 0.062 | −1.2076083105017461   |
| 2 | 0.114 | −0.94309514866352739  |
| 2 | 0.09  | −1.0457574905606752   |
| 2 | 1.398 | 0.14550717140966257   |
| 2 | 0.104 | −0.98296666070121963  |
| 2 | 0.084 | −1.0757207139381184   |
| 2 | 0.071 | −1.1487416512809248   |
| 2 | 0.094 | −1.0268721464003014   |
| 2 | 0.094 | −1.0268721464003014   |
| 2 | 0.146 | −0.835647144215563    |
| 2 | 0.146 | −0.835647144215563    |
| 2 | 0.084 | −1.0757207139381184   |
| 2 | 0.084 | −1.0757207139381184   |
| 2 | 0.134 | −0.8728952016351923   |
| 2 | 0.087 | −1.0604807473813815   |
| 2 | 0.166 | −0.77989191195994489  |



|   |       |                       |
|---|-------|-----------------------|
| 2 | 0.069 | -1.1611509092627446   |
| 2 | 0.063 | -1.2006594505464183   |
| 2 | 0.099 | -1.00436480540245     |
| 2 | 0.616 | -0.21041928783557454  |
| 2 | 0.049 | -1.3098039199714864   |
| 2 | 0.069 | -1.1611509092627446   |
| 2 | 0.064 | -1.1938200260161129   |
| 2 | 0.07  | -1.1549019599857431   |
| 2 | 0.066 | -1.1804560644581312   |
| 2 | 0.077 | -1.1135092748275182   |
| 2 | 0.099 | -1.00436480540245     |
| 2 | 0.099 | -1.00436480540245     |
| 2 | 0.059 | -1.2291479883578558   |
| 2 | 0.109 | -0.96257350205937642  |
| 2 | 0.829 | -0.081445469449726471 |
| 2 | 0.188 | -0.72584215073632019  |
| 2 | 0.104 | -0.98296666070121963  |
| 2 | 0.09  | -1.0457574905606752   |
| 2 | 0.113 | -0.94692155651658028  |
| 2 | 0.118 | -0.92811799269387463  |
| 2 | 0.071 | -1.1487416512809248   |
| 2 | 0.1   | -1                    |
| 2 | 0.099 | -1.00436480540245     |
| 2 | 0.064 | -1.1938200260161129   |
| 2 | 0.076 | -1.1191864077192086   |
| 2 | 0.096 | -1.0177287669604316   |
| 2 | 0.132 | -0.87942606879415008  |
| 2 | 0.056 | -1.2518119729937995   |
| 2 | 0.091 | -1.0409586076789064   |
| 2 | 0.069 | -1.1611509092627446   |
| 2 | 0.079 | -1.1023729087095586   |
| 2 | 0.05  | -1.3010299956639813   |
| 2 | 0.602 | -0.22040350874217546  |
| 2 | 0.057 | -1.2441251443275085   |
| 2 | 0.094 | -1.0268721464003014   |
| 2 | 0.094 | -1.0268721464003014   |
| 2 | 0.115 | -0.9393021596463883   |
| 2 | 0.117 | -0.9318141382538383   |
| 2 | 0.119 | -0.9244530386074693   |
| 2 | 0.084 | -1.0757207139381184   |
| 2 | 0.066 | -1.1804560644581312   |
| 2 | 0.675 | -0.17069622716897506  |
| 2 | 0.091 | -1.0409586076789064   |
| 2 | 0.073 | -1.1366771398795441   |
| 2 | 0.143 | -0.84466396253493825  |
| 2 | 0.069 | -1.1611509092627446   |
| 2 | 0.069 | -1.1611509092627446   |
| 2 | 0.121 | -0.91721462968354994  |
| 2 | 0.066 | -1.1804560644581312   |
| 2 | 0.225 | -0.64781748188863753  |
| 2 | 0.226 | -0.645891560852599    |

|   |       |                       |
|---|-------|-----------------------|
| 2 | 0.099 | −1.00436480540245     |
| 2 | 0.078 | −1.1079053973095197   |
| 2 | 0.066 | −1.1804560644581312   |
| 2 | 0.068 | −1.1674910872937636   |
| 2 | 0.044 | −1.3565473235138126   |
| 2 | 0.022 | −1.6575773191777938   |
| 2 | 0.104 | −0.98296666070121963  |
| 2 | 0.078 | −1.1079053973095197   |
| 2 | 0.075 | −1.1249387366083      |
| 2 | 0.103 | −0.98716277529482777  |
| 2 | 0.118 | −0.92811799269387463  |
| 2 | 0.056 | −1.2518119729937995   |
| 2 | 0.081 | −1.0915149811213503   |
| 2 | 0.076 | −1.1191864077192086   |
| 2 | 0.049 | −1.3098039199714864   |
| 2 | 0.076 | −1.1191864077192086   |
| 2 | 0.101 | −0.99567862621735737  |
| 2 | 0.069 | −1.1611509092627446   |
| 2 | 0.083 | −1.080921907623926    |
| 2 | 0.09  | −1.0457574905606752   |
| 2 | 0.091 | −1.0409586076789064   |
| 2 | 0.104 | −0.98296666070121963  |
| 2 | 0.049 | −1.3098039199714864   |
| 2 | 0.917 | −0.037630664329978893 |
| 2 | 1.105 | 0.0433622780211295    |

**Table S2.** Individual values of 5-mC in the genomic DNA of B+ and B− females.

|           | Individual | Value | Log value             |
|-----------|------------|-------|-----------------------|
| Female B− |            |       |                       |
|           | 3          | 0.167 | −0.77728352885241669  |
|           | 3          | 0.161 | −0.79317412396815024  |
|           | 3          | 0.087 | −1.0604807473813815   |
|           | 3          | 0.157 | −0.80410034759076621  |
|           | 3          | 0.129 | −0.889410289700751    |
|           | 3          | 0.089 | −1.0506099933550872   |
|           | 3          | 0.114 | −0.94309514866352739  |
|           | 3          | 0.084 | −1.0757207139381184   |
|           | 3          | 0.129 | −0.889410289700751    |
|           | 3          | 0.094 | −1.0268721464003014   |
|           | 3          | 0.177 | −0.75202673363819339  |
|           | 3          | 0.101 | −0.99567862621735737  |
|           | 3          | 0.176 | −0.75448733218585018  |
|           | 3          | 0.08  | −1.0969100130080565   |
|           | 3          | 0.058 | −1.2365720064370627   |
|           | 3          | 0.077 | −1.1135092748275182   |
|           | 3          | 0.088 | −1.0555173278498313   |
|           | 3          | 0.07  | −1.1549019599857431   |
|           | 3          | 0.114 | −0.94309514866352739  |
|           | 3          | 0.073 | −1.1366771398795441   |
|           | 3          | 0.059 | −1.2291479883578558   |
|           | 3          | 0.069 | −1.1611509092627446   |
|           | 3          | 0.128 | −0.89279003035213167  |
|           | 3          | 0.069 | −1.1611509092627446   |
|           | 3          | 0.075 | −1.1249387366083      |
|           | 3          | 0.063 | −1.2006594505464183   |
|           | 3          | 0.077 | −1.1135092748275182   |
|           | 3          | 0.061 | −1.2146701649892331   |
|           | 3          | 0.062 | −1.2076083105017461   |
|           | 3          | 0.133 | −0.87614835903291421  |
|           | 3          | 0.052 | −1.2839966563652008   |
|           | 3          | 0.074 | −1.1307682802690238   |
|           | 3          | 0.079 | −1.1023729087095586   |
|           | 3          | 0.832 | −0.079876673709276078 |
|           | 3          | 0.07  | −1.1549019599857431   |
|           | 3          | 0.118 | −0.92811799269387463  |
|           | 3          | 0.053 | −1.2757241303992111   |
|           | 3          | 0.083 | −1.080921907623926    |
|           | 3          | 0.083 | −1.080921907623926    |
|           | 3          | 0.062 | −1.2076083105017461   |
|           | 3          | 0.059 | −1.2291479883578558   |
|           | 3          | 0.073 | −1.1366771398795441   |
|           | 3          | 0.079 | −1.1023729087095586   |
|           | 3          | 0.135 | −0.86966623150499389  |
|           | 3          | 0.091 | −1.0409586076789064   |
|           | 3          | 0.123 | −0.91009488856060206  |
|           | 3          | 0.187 | −0.72815839346350109  |

|   |       |                       |
|---|-------|-----------------------|
| 3 | 0.106 | −0.97469413473522981  |
| 3 | 0.112 | −0.9507819773298184   |
| 3 | 0.201 | −0.69680394257951106  |
| 3 | 0.099 | −1.00436480540245     |
| 3 | 0.069 | −1.1611509092627446   |
| 3 | 0.066 | −1.1804560644581312   |
| 3 | 0.04  | −1.3979400086720375   |
| 3 | 0.093 | −1.031517051446065    |
| 3 | 0.103 | −0.98716277529482777  |
| 3 | 0.094 | −1.0268721464003014   |
| 3 | 0.91  | −0.040958607678906384 |
| 3 | 0.103 | −0.98716277529482777  |
| 3 | 0.132 | −0.87942606879415008  |
| 3 | 0.047 | −1.3279021420642825   |
| 3 | 0.063 | −1.2006594505464183   |
| 3 | 0.084 | −1.0757207139381184   |
| 3 | 0.068 | −1.1674910872937636   |
| 3 | 0.062 | −1.2076083105017461   |
| 3 | 0.079 | −1.1023729087095586   |
| 3 | 0.083 | −1.080921907623926    |
| 3 | 0.12  | −0.92081875395237522  |
| 3 | 0.074 | −1.1307682802690238   |
| 3 | 0.084 | −1.0757207139381184   |
| 3 | 0.066 | −1.1804560644581312   |
| 3 | 0.114 | −0.94309514866352739  |
| 3 | 0.071 | −1.1487416512809248   |
| 3 | 0.042 | −1.3767507096020994   |
| 3 | 0.084 | −1.0757207139381184   |
| 3 | 0.056 | −1.2518119729937995   |
| 3 | 0.053 | −1.2757241303992111   |
| 3 | 0.042 | −1.3767507096020994   |
| 3 | 0.053 | −1.2757241303992111   |
| 3 | 0.035 | −1.4559319556497243   |
| 3 | 0.162 | −0.790484985457369    |
| 3 | 0.134 | −0.8728952016351923   |
| 3 | 0.112 | −0.9507819773298184   |
| 3 | 0.13  | −0.88605664769316317  |
| 3 | 0.053 | −1.2757241303992111   |
| 3 | 0.035 | −1.4559319556497243   |
| 3 | 0.059 | −1.2291479883578558   |
| 3 | 0.107 | −0.97061622231479039  |
| 3 | 0.043 | −1.3665315444204136   |
| 3 | 1     | 0                     |
| 3 | 0.111 | −0.95467702121334252  |
| 3 | 0.073 | −1.1366771398795441   |
| 3 | 0.089 | −1.0506099933550872   |
| 3 | 0.066 | −1.1804560644581312   |
| 3 | 0.079 | −1.1023729087095586   |
| 3 | 0.059 | −1.2291479883578558   |
| 3 | 0.104 | −0.98296666070121963  |
| 3 | 0.099 | −1.00436480540245     |

|   |       |                      |
|---|-------|----------------------|
| 3 | 0.04  | -1.3979400086720375  |
| 3 | 0.049 | -1.3098039199714864  |
| 3 | 0.074 | -1.1307682802690238  |
| 3 | 0.105 | -0.978810700930062   |
| 3 | 0.073 | -1.1366771398795441  |
| 3 | 0.064 | -1.1938200260161129  |
| 3 | 0.1   | -1                   |
| 3 | 0.078 | -1.1079053973095197  |
| 3 | 0.081 | -1.0915149811213503  |
| 3 | 0.056 | -1.2518119729937995  |
| 3 | 0.084 | -1.0757207139381184  |
| 3 | 0.096 | -1.0177287669604316  |
| 3 | 0.078 | -1.1079053973095197  |
| 3 | 0.054 | -1.2676062401770316  |
| 3 | 0.029 | -1.5376020021010439  |
| 3 | 0.081 | -1.0915149811213503  |
| 3 | 0.084 | -1.0757207139381184  |
| 3 | 0.047 | -1.3279021420642825  |
| 3 | 0.121 | -0.91721462968354994 |
| 3 | 0.075 | -1.1249387366083     |
| 3 | 0.135 | -0.86966623150499389 |
| 3 | 0.785 | -0.10513034325474745 |
| 3 | 0.066 | -1.1804560644581312  |
| 3 | 0.07  | -1.1549019599857431  |
| 3 | 0.146 | -0.835647144215563   |
| 3 | 0.128 | -0.89279003035213167 |
| 3 | 0.042 | -1.3767507096020994  |
| 3 | 0.076 | -1.1191864077192086  |
| 3 | 0.104 | -0.98296666070121963 |
| 3 | 0.097 | -1.0132282657337552  |
| 3 | 0.098 | -1.0087739243075051  |
| 3 | 0.069 | -1.1611509092627446  |
| 3 | 0.084 | -1.0757207139381184  |
| 3 | 0.083 | -1.080921907623926   |
| 3 | 0.077 | -1.1135092748275182  |
| 3 | 0.07  | -1.1549019599857431  |
| 3 | 0.091 | -1.0409586076789064  |
| 3 | 0.06  | -1.2218487496163564  |
| 3 | 0.132 | -0.87942606879415008 |
| 3 | 0.06  | -1.2218487496163564  |
| 3 | 0.054 | -1.2676062401770316  |
| 3 | 0.119 | -0.9244530386074693  |
| 3 | 0.086 | -1.0655015487564323  |
| 3 | 0.097 | -1.0132282657337552  |
| 3 | 0.088 | -1.0555173278498313  |
| 3 | 0.071 | -1.1487416512809248  |
| 3 | 0.049 | -1.3098039199714864  |
| 3 | 0.118 | -0.92811799269387463 |
| 3 | 0.076 | -1.1191864077192086  |
| 3 | 0.097 | -1.0132282657337552  |
| 3 | 0.077 | -1.1135092748275182  |

|   |       |                      |
|---|-------|----------------------|
| 3 | 0.086 | -1.0655015487564323  |
| 3 | 0.056 | -1.2518119729937995  |
| 3 | 0.093 | -1.031517051446065   |
| 3 | 0.089 | -1.0506099933550872  |
| 3 | 0.078 | -1.1079053973095197  |
| 3 | 1.226 | 0.088490470182396225 |
| 3 | 0.079 | -1.1023729087095586  |
| 3 | 0.089 | -1.0506099933550872  |
| 3 | 0.116 | -0.93554201077308152 |
| 3 | 0.183 | -0.73754891026957059 |
| 3 | 0.069 | -1.1611509092627446  |
| 3 | 0.074 | -1.1307682802690238  |
| 3 | 0.119 | -0.9244530386074693  |
| 3 | 0.054 | -1.2676062401770316  |
| 3 | 0.104 | -0.98296666070121963 |
| 3 | 0.094 | -1.0268721464003014  |
| 3 | 0.081 | -1.0915149811213503  |
| 3 | 0.13  | -0.88605664769316317 |
| 3 | 0.098 | -1.0087739243075051  |
| 3 | 0.078 | -1.1079053973095197  |
| 3 | 0.12  | -0.92081875395237522 |
| 3 | 0.14  | -0.85387196432176193 |
| 3 | 0.075 | -1.1249387366083     |
| 3 | 0.135 | -0.86966623150499389 |
| 3 | 0.121 | -0.91721462968354994 |
| 3 | 0.086 | -1.0655015487564323  |
| 3 | 0.059 | -1.2291479883578558  |
| 3 | 0.125 | -0.90308998699194354 |
| 3 | 0.118 | -0.92811799269387463 |
| 3 | 0.075 | -1.1249387366083     |
| 3 | 0.18  | -0.744727494896694   |
| 3 | 0.76  | -0.11918640771920865 |
| 3 | 0.1   | -1                   |
| 3 | 0.086 | -1.0655015487564323  |
| 3 | 0.093 | -1.031517051446065   |
| 3 | 0.081 | -1.0915149811213503  |
| 3 | 0.082 | -1.0861861476162833  |
| 3 | 0.089 | -1.0506099933550872  |
| 3 | 0.082 | -1.0861861476162833  |
| 3 | 0.056 | -1.2518119729937995  |
| 3 | 0.098 | -1.0087739243075051  |
| 3 | 0.116 | -0.93554201077308152 |
| 3 | 0.094 | -1.0268721464003014  |
| 3 | 0.073 | -1.1366771398795441  |
| 3 | 0.058 | -1.2365720064370627  |
| 3 | 0.075 | -1.1249387366083     |
| 3 | 0.055 | -1.2596373105057561  |
| 3 | 0.082 | -1.0861861476162833  |
| 3 | 0.074 | -1.1307682802690238  |
| 3 | 0.078 | -1.1079053973095197  |
| 3 | 0.084 | -1.0757207139381184  |

|           |   |       |                      |
|-----------|---|-------|----------------------|
|           | 3 | 0.066 | −1.1804560644581312  |
|           | 3 | 0.093 | −1.031517051446065   |
|           | 3 | 0.118 | −0.92811799269387463 |
|           | 3 | 0.075 | −1.1249387366083     |
|           | 3 | 0.18  | −0.744727494896694   |
|           | 3 | 0.125 | −0.90308998699194354 |
|           | 3 | 0.069 | −1.1611509092627446  |
|           | 3 | 0.069 | −1.1611509092627446  |
|           | 3 | 0.707 | −0.15058058620310061 |
|           | 3 | 0.062 | −1.2076083105017461  |
|           | 3 | 0.061 | −1.2146701649892331  |
|           | 3 | 0.109 | −0.96257350205937642 |
|           | 3 | 0.089 | −1.0506099933550872  |
|           | 3 | 0.127 | −0.89619627904404309 |
|           | 3 | 0.104 | −0.98296666070121963 |
|           | 3 | 0.115 | −0.9393021596463883  |
|           | 3 | 0.096 | −1.0177287669604316  |
|           | 3 | 0.098 | −1.0087739243075051  |
|           | 3 | 0.119 | −0.9244530386074693  |
|           | 3 | 0.096 | −1.0177287669604316  |
|           | 3 | 0.109 | −0.96257350205937642 |
|           | 3 | 0.056 | −1.2518119729937995  |
|           | 3 | 0.111 | −0.95467702121334252 |
|           | 3 | 0.104 | −0.98296666070121963 |
|           | 3 | 0.049 | −1.3098039199714864  |
|           | 3 | 0.059 | −1.2291479883578558  |
|           | 3 | 0.123 | −0.91009488856060206 |
|           | 3 | 0.083 | −1.080921907623926   |
|           | 3 | 0.053 | −1.2757241303992111  |
|           | 3 | 0.047 | −1.3279021420642825  |
|           | 3 | 0.152 | −0.81815641205522749 |
|           | 3 | 0.178 | −0.74957999769110606 |
|           | 3 | 0.059 | −1.2291479883578558  |
|           | 3 | 0.155 | −0.8096683018297085  |
|           | 3 | 0.084 | −1.0757207139381184  |
|           | 3 | 0.081 | −1.0915149811213503  |
|           | 3 | 0.084 | −1.0757207139381184  |
|           | 3 | 0.119 | −0.9244530386074693  |
|           | 3 | 0.076 | −1.1191864077192086  |
|           | 3 | 0.125 | −0.90308998699194354 |
|           | 3 | 0.836 | −0.07779372256098363 |
| Female B+ |   |       |                      |
|           | 4 | 0.085 | −1.0705810742857072  |
|           | 4 | 0.104 | −0.98296666070121963 |
|           | 4 | 0.134 | −0.8728952016351923  |
|           | 4 | 0.091 | −1.0409586076789064  |
|           | 4 | 0.182 | −0.73992861201492521 |
|           | 4 | 0.214 | −0.66958622665080914 |
|           | 4 | 0.156 | −0.80687540164553839 |
|           | 4 | 0.083 | −1.080921907623926   |
|           | 4 | 0.135 | −0.86966623150499389 |

|   |       |                       |
|---|-------|-----------------------|
| 4 | 0.079 | -1.1023729087095586   |
| 4 | 0.073 | -1.1366771398795441   |
| 4 | 0.049 | -1.3098039199714864   |
| 4 | 0.119 | -0.9244530386074693   |
| 4 | 0.115 | -0.9393021596463883   |
| 4 | 0.133 | -0.87614835903291421  |
| 4 | 0.162 | -0.790484985457369    |
| 4 | 0.081 | -1.0915149811213503   |
| 4 | 0.119 | -0.9244530386074693   |
| 4 | 0.74  | -0.13076828026902382  |
| 4 | 0.1   | -1                    |
| 4 | 0.07  | -1.1549019599857431   |
| 4 | 0.176 | -0.75448733218585018  |
| 4 | 0.074 | -1.1307682802690238   |
| 4 | 0.091 | -1.0409586076789064   |
| 4 | 0.093 | -1.031517051446065    |
| 4 | 0.112 | -0.9507819773298184   |
| 4 | 0.063 | -1.2006594505464183   |
| 4 | 0.967 | -0.014573525916998339 |
| 4 | 0.073 | -1.1366771398795441   |
| 4 | 0.114 | -0.94309514866352739  |
| 4 | 0.148 | -0.82973828460504262  |
| 4 | 0.088 | -1.0555173278498313   |
| 4 | 0.054 | -1.2676062401770316   |
| 4 | 0.073 | -1.1366771398795441   |
| 4 | 0.069 | -1.1611509092627446   |
| 4 | 0.147 | -0.83268266525182388  |
| 4 | 0.116 | -0.93554201077308152  |
| 4 | 0.045 | -1.3467874862246563   |
| 4 | 0.131 | -0.88272870434423567  |
| 4 | 0.068 | -1.1674910872937636   |
| 4 | 0.091 | -1.0409586076789064   |
| 4 | 0.054 | -1.2676062401770316   |
| 4 | 0.164 | -0.78515615195230215  |
| 4 | 0.058 | -1.2365720064370627   |
| 4 | 0.066 | -1.1804560644581312   |
| 4 | 0.075 | -1.1249387366083      |
| 4 | 0.049 | -1.3098039199714864   |
| 4 | 0.057 | -1.2441251443275085   |
| 4 | 0.058 | -1.2365720064370627   |
| 4 | 0.061 | -1.2146701649892331   |
| 4 | 0.042 | -1.3767507096020994   |
| 4 | 0.667 | -0.17587416608345102  |
| 4 | 0.562 | -0.25026368443093888  |
| 4 | 0.105 | -0.978810700930062    |
| 4 | 0.16  | -0.79588001734407521  |
| 4 | 0.091 | -1.0409586076789064   |
| 4 | 0.057 | -1.2441251443275085   |
| 4 | 0.069 | -1.1611509092627446   |
| 4 | 0.071 | -1.1487416512809248   |
| 4 | 0.157 | -0.80410034759076621  |



|   |       |                        |
|---|-------|------------------------|
| 4 | 0.058 | -1.2365720064370627    |
| 4 | 0.07  | -1.1549019599857431    |
| 4 | 0.063 | -1.2006594505464183    |
| 4 | 0.08  | -1.0969100130080565    |
| 4 | 0.14  | -0.85387196432176193   |
| 4 | 0.09  | -1.0457574905606752    |
| 4 | 0.062 | -1.2076083105017461    |
| 4 | 0.052 | -1.2839966563652008    |
| 4 | 0.059 | -1.2291479883578558    |
| 4 | 0.083 | -1.080921907623926     |
| 4 | 0.083 | -1.080921907623926     |
| 4 | 0.076 | -1.1191864077192086    |
| 4 | 0.124 | -0.906578314837765     |
| 4 | 0.055 | -1.2596373105057561    |
| 4 | 0.059 | -1.2291479883578558    |
| 4 | 0.085 | -1.0705810742857072    |
| 4 | 0.069 | -1.1611509092627446    |
| 4 | 0.099 | -1.00436480540245      |
| 4 | 0.086 | -1.0655015487564323    |
| 4 | 0.064 | -1.1938200260161129    |
| 4 | 0.669 | -0.17457388223217688   |
| 4 | 0.607 | -0.21681130892474243   |
| 4 | 0.191 | -0.71896663275227246   |
| 4 | 0.091 | -1.0409586076789064    |
| 4 | 0.097 | -1.0132282657337552    |
| 4 | 0.108 | -0.96657624451305035   |
| 4 | 0.192 | -0.71669877129645043   |
| 4 | 0.097 | -1.0132282657337552    |
| 4 | 0.121 | -0.91721462968354994   |
| 4 | 0.111 | -0.95467702121334252   |
| 4 | 0.123 | -0.91009488856060206   |
| 4 | 0.088 | -1.0555173278498313    |
| 4 | 0.131 | -0.88272870434423567   |
| 4 | 0.084 | -1.0757207139381184    |
| 4 | 0.091 | -1.0409586076789064    |
| 4 | 0.101 | -0.99567862621735737   |
| 4 | 0.984 | -0.0070049015686584892 |
| 4 | 0.155 | -0.8096683018297085    |
| 4 | 0.096 | -1.0177287669604316    |
| 4 | 0.061 | -1.2146701649892331    |
| 4 | 0.058 | -1.2365720064370627    |
| 4 | 0.064 | -1.1938200260161129    |
| 4 | 0.105 | -0.978810700930062     |
| 4 | 0.063 | -1.2006594505464183    |
| 4 | 0.105 | -0.978810700930062     |
| 4 | 0.096 | -1.0177287669604316    |
| 4 | 0.052 | -1.2839966563652008    |
| 4 | 0.163 | -0.78781239559604221   |
| 4 | 0.078 | -1.1079053973095197    |
| 4 | 0.074 | -1.1307682802690238    |
| 4 | 0.096 | -1.0177287669604316    |

|   |       |                       |
|---|-------|-----------------------|
| 4 | 0.065 | −1.1870866433571443   |
| 4 | 0.103 | −0.98716277529482777  |
| 4 | 0.085 | −1.0705810742857072   |
| 4 | 0.087 | −1.0604807473813815   |
| 4 | 0.073 | −1.1366771398795441   |
| 4 | 0.067 | −1.1739251972991736   |
| 4 | 0.049 | −1.3098039199714864   |
| 4 | 0.049 | −1.3098039199714864   |
| 4 | 0.063 | −1.2006594505464183   |
| 4 | 0.075 | −1.1249387366083      |
| 4 | 0.071 | −1.1487416512809248   |
| 4 | 0.081 | −1.0915149811213503   |
| 4 | 0.57  | −0.24412514432750865  |
| 4 | 0.832 | −0.079876673709276078 |
| 4 | 0.076 | −1.1191864077192086   |
| 4 | 0.09  | −1.0457574905606752   |
| 4 | 0.066 | −1.1804560644581312   |
| 4 | 0.11  | −0.958607314841775    |
| 4 | 0.074 | −1.1307682802690238   |
| 4 | 0.088 | −1.0555173278498313   |
| 4 | 0.089 | −1.0506099933550872   |
| 4 | 0.081 | −1.0915149811213503   |
| 4 | 0.066 | −1.1804560644581312   |
| 4 | 0.062 | −1.2076083105017461   |
| 4 | 0.084 | −1.0757207139381184   |
| 4 | 0.156 | −0.80687540164553839  |
| 4 | 0.202 | −0.69464863055337622  |
| 4 | 0.076 | −1.1191864077192086   |
| 4 | 0.068 | −1.1674910872937636   |
| 4 | 0.081 | −1.0915149811213503   |
| 4 | 0.042 | −1.3767507096020994   |
| 4 | 0.054 | −1.2676062401770316   |
| 4 | 0.069 | −1.1611509092627446   |
| 4 | 0.062 | −1.2076083105017461   |
| 4 | 0.118 | −0.92811799269387463  |
| 4 | 0.097 | −1.0132282657337552   |
| 4 | 0.081 | −1.0915149811213503   |
| 4 | 0.069 | −1.1611509092627446   |
| 4 | 0.037 | −1.431798275933005    |
| 4 | 0.063 | −1.2006594505464183   |
| 4 | 0.049 | −1.3098039199714864   |
| 4 | 0.068 | −1.1674910872937636   |
| 4 | 0.126 | −0.89962945488243706  |
| 4 | 0.064 | −1.1938200260161129   |
| 4 | 0.877 | −0.057000406633959479 |
| 4 | 1.232 | 0.090610707828406648  |
| 4 | 0.076 | −1.1191864077192086   |
| 4 | 0.085 | −1.0705810742857072   |
| 4 | 0.1   | −1                    |
| 4 | 0.09  | −1.0457574905606752   |
| 4 | 0.09  | −1.0457574905606752   |

|   |       |                       |
|---|-------|-----------------------|
| 4 | 0.044 | -1.3565473235138126   |
| 4 | 0.042 | -1.3767507096020994   |
| 4 | 0.139 | -0.85698519974590492  |
| 4 | 0.068 | -1.1674910872937636   |
| 4 | 0.192 | -0.71669877129645043  |
| 4 | 0.044 | -1.3565473235138126   |
| 4 | 0.084 | -1.0757207139381184   |
| 4 | 0.113 | -0.94692155651658028  |
| 4 | 0.069 | -1.1611509092627446   |
| 4 | 0.056 | -1.2518119729937995   |
| 4 | 0.094 | -1.0268721464003014   |
| 4 | 0.091 | -1.0409586076789064   |
| 4 | 0.056 | -1.2518119729937995   |
| 4 | 0.064 | -1.1938200260161129   |
| 4 | 0.064 | -1.1938200260161129   |
| 4 | 0.103 | -0.98716277529482777  |
| 4 | 0.132 | -0.87942606879415008  |
| 4 | 0.028 | -1.5528419686577808   |
| 4 | 0.106 | -0.97469413473522981  |
| 4 | 0.047 | -1.3279021420642825   |
| 4 | 0.119 | -0.9244530386074693   |
| 4 | 0.109 | -0.96257350205937642  |
| 4 | 0.109 | -0.96257350205937642  |
| 4 | 0.086 | -1.0655015487564323   |
| 4 | 0.155 | -0.8096683018297085   |
| 4 | 0.066 | -1.1804560644581312   |
| 4 | 0.814 | -0.0893755951107988   |
| 4 | 0.995 | -0.002176919254274547 |
| 4 | 0.077 | -1.1135092748275182   |
| 4 | 0.183 | -0.73754891026957059  |
| 4 | 0.069 | -1.1611509092627446   |
| 4 | 0.097 | -1.0132282657337552   |
| 4 | 0.079 | -1.1023729087095586   |
| 4 | 0.064 | -1.1938200260161129   |
| 4 | 0.056 | -1.2518119729937995   |
| 4 | 0.073 | -1.1366771398795441   |
| 4 | 0.125 | -0.90308998699194354  |
| 4 | 0.109 | -0.96257350205937642  |
| 4 | 0.153 | -0.81530856918240124  |
| 4 | 0.066 | -1.1804560644581312   |
| 4 | 0.053 | -1.2757241303992111   |
| 4 | 0.084 | -1.0757207139381184   |
| 4 | 0.161 | -0.79317412396815024  |
| 4 | 0.049 | -1.3098039199714864   |
| 4 | 0.162 | -0.790484985457369    |
| 4 | 0.118 | -0.92811799269387463  |
| 4 | 0.073 | -1.1366771398795441   |
| 4 | 0.066 | -1.1804560644581312   |
| 4 | 0.04  | -1.3979400086720375   |
| 4 | 0.045 | -1.3467874862246563   |
| 4 | 0.541 | -0.26680273489343054  |

---

|   |       |                      |
|---|-------|----------------------|
| 4 | 0.684 | −0.16494389827988373 |
|---|-------|----------------------|
